# Connecting the dots between computational tools to analyse soil-root water relations

Sixtine Passot<sup>+1</sup>, Valentin Couvreur<sup>+1</sup>, Félicien Meunier<sup>+1,2</sup>, Xavier Draye<sup>1</sup>,  
Mathieu Javaux<sup>1,3</sup>, Daniel Leitner<sup>4</sup>, Loïc Pagès<sup>5</sup>, Andrea Schnepf<sup>3</sup>, Jan  
Vanderborght<sup>3</sup> and Guillaume Lobet<sup>1,3,°</sup>

<sup>+</sup> These authors contributed equally to this work.

<sup>°</sup> Corresponding author. +32 10 47 92 87

<sup>1</sup> Earth and Life Institute, Université catholique de Louvain, Louvain-la-Neuve, Belgium

<sup>2</sup> Computational and Applied Vegetation Ecology lab, Ghent University, Ghent, Belgium

<sup>3</sup> Agrosphere, IBG3, Forschungszentrum Jülich, Jülich, Germany

<sup>4</sup> Simulationswerkstatt, Ortmayrstrasse 20, A-4060 Leonding, Austria

<sup>5</sup> INRA, Centre PACA, UR 1115 PSH, 84914 Avignon cedex 9, France

## Abstract

In the recent years, many computational tools, such as image analysis, data management, process-based simulation and upscaling tools, were developed to help quantify and understand water flow in the soil-root system, at multiple scales (tissue, organ, plant and population). Several of these tools work together or, at least, are compatible. However, for the un-informed researcher, they might seem disconnected, forming a unclear and disorganised succession of tools.

In this article, we present how different pieces of work can be further developed by connecting them to analyse soil-root-water relations in a comprehensive and structured network. This “explicit network of soil-root computational tools” informs the reader about existing tools and help them understand how their data (past and future) might fit within the network. We also demonstrate the novel possibilities of scale-consistent parameterizations made possible by the network with a set of case studies from the literature. Finally, we discuss existing gaps in the network and how we can move forward to fill them.

---

## Highlights

Many computational tools exist to quantify water flow in the soil-root system. These tools can be arranged in a comprehensive network that can be leveraged to better interpret experimental data.

35

## Keywords

Computational tools, image analysis, simulation, network, root, soil, water

## Manuscript information

40

- Words: 5568
- Figures: 6 colors
- Table: 1
- Web application: [https://plantmodelling.shinyapps.io/water\\_network/](https://plantmodelling.shinyapps.io/water_network/).

---

|                   |                                |                     |
|-------------------|--------------------------------|---------------------|
| Sixtine Passot    | sixtine.passot@uclouvain.be    | 0000-0002-6191-723X |
| Valentin Couvreur | valentin.couvreur@uclouvain.be | 0000-0002-1087-3978 |
| Félicien Meunier  | felicien.meunier@uclouvain.be  | 0000-0003-2486-309X |
| Xavier Draye      | xavier.draye@uclouvain.be      | 0000-0002-3637-3330 |
| Mathieu Javaux    | mathieu.javaux@uclouvain.be    | 0000-0002-6168-5467 |
| Daniel Leitner    | daniel.leitner@simwerk.at      |                     |
| Loïc Pagès        | loic.pages@inra.fr             | 0000-0002-2476-6401 |
| Andrea Schnepf    | a.schnepf@fz-juelich.de        | 0000-0003-2203-4466 |
| Jan Vanderborght  | j.vanderborght@fz-juelich.de   | 0000-0001-7381-3211 |
| Guillaume Lobet   | g.lobet@fz-juelich.de          | 0000-0002-5883-4572 |

---

---

## Glossary

| Term                     | Definition                                                                                                                                                                                                                                         | Reference |
|--------------------------|----------------------------------------------------------------------------------------------------------------------------------------------------------------------------------------------------------------------------------------------------|-----------|
| Standard Uptake Fraction | Relative distribution of root water uptake between root segments when water is equally available in space (units: %)                                                                                                                               | [1]       |
| High pressure flow meter | Device designed to measure the root system conductance by perfusing pressurized water into a root system opposite from the natural direction of the transpiration stream                                                                           | [2]       |
| Root pressure probe      | Device designed to measure the hydraulic conductance of a single root through variations of water pressure and flow at the cut end of a root                                                                                                       | [3]       |
| Cell pressure probe      | Device designed to measure the hydraulic conductivity of the membranes of a single plant cell by observing the relaxation time of water pressure pulses applied to the cell                                                                        | [4]       |
| RSML                     | Root System Markup Language: File format for the storage of root system data                                                                                                                                                                       | [5]       |
| MTG                      | Multi-Tree Graph: File format for the storage of multidimensional tree information, designed for plant models.                                                                                                                                     | [6]       |
| FSPM                     | Functional-Structural Plant Model: computer model of plant that combine a detailed representation of the plant 3D architecture with functional properties (radial hydraulic conductivity, solute permeability, etc.)                               | [7]       |
| Parameter                | Fixed input of the models that characterizes a specific property of the system, within the scope of study. For instance, branching rates are parameters in root architectural models                                                               |           |
| State variable           | Variable that characterizes the state of the system at any moment of the simulation. For instance, the water potential within the plant is a state variable in water FSPM                                                                          |           |
| Boundary conditions      | Variables constraining the model at its external boundaries for the entire duration of the simulation. For instance, in model of water flow within the root system, evaporative demand or soil water potentials are the plant boundary conditions. |           |
| Upscaled property        | System property that is an output of the model, at a higher scale than the input parameters. For instance, the root radial conductivity is an upscaled property of models of root organ water flow.                                                |           |

---

## Water flow in the soil-root system

130 Water deficit is one of the most dramatic abiotic stresses in agriculture [8]. It  
occurs when leaf water supply is limited by either the low potential of soil  
water, and/or by the high hydraulic resistance of the soil-plant system [9]. At  
this point, the atmospheric demand for water is hardly met and stomata  
close, reducing the plant transpiration and photosynthesis. To investigate  
135 when such limitation occurs, the complex plant-soil-atmosphere system is  
often conceptualised as a multidimensional hydraulic network, in which both  
soil and root hydraulic properties may substantially control shoot water  
supply [10–12].

140 The **structural properties** of the roots compose the first dimension of the  
soil-root hydraulic network. Structural properties refer to the physical position  
and arrangement of the objects of interest. They can be conceptualised at  
the tissue/organ (transversal anatomy, fig. 1A), plant (root architecture, fig.  
1B), or population scale (rooting density profile, fig. 1C).

145 A second dimension, overlaying structural properties, encompasses the  
system **functional properties**. When studying water movement, functional  
properties often refer to hydraulic conductivities or reflection coefficients.  
Like in the structural layer, these properties can be defined at different  
scales. Local radial and axial hydraulic conductivities can be defined at the  
organ scale (fig. 1D) while the entire root system of a single plant can be  
150 characterized by its conductance (fig. 1E) and would relate to plant water  
status [13]. An extension of this property to the population scale is the plant  
population hydraulic conductance per unit horizontal area (fig. 1F), common  
in canopy models [14], and recently integrated in root models [15].

155 Finally, a third dimension describes the plant **environment**. In this  
contribution, we focus on the soil compartment, which includes the  
rhizosphere and the bulk soil (fig. 1G). Their respective spatial domains are  
concentric around individual roots, and their properties differ substantially, so  
that the rhizosphere is often considered to critically affect plant water  
availability under water deficit [16,17]. The bulk soil and rhizosphere  
hydraulic properties may be described by their water retention and hydraulic  
160 conductivity curves. The former defines the pressure needed to extract water  
from the porous media, and the latter the relation between water flux and  
water potential gradient in space [18]. The water potential that defines the  
energy level of water is a critical environmental variable, driving the flow of  
water in the soil-plant system. Similarly to the plant, the soil could be divided

165 into functional and structural components and described according to the  
studied scale. However, we did not explicit this separation in the following as  
we rather focus on the plant property description in this study.

170 Each element of the network is dynamic and heterogeneous. Root systems  
grow, develop and take up water, while soil water content continuously  
changes in response to root water uptake and climatic conditions, potentially  
resulting in complex system behaviour. In addition, some key variables and  
parameters are hard (if not impossible) to quantify experimentally. As a  
result, the whole system is difficult to apprehend, and novel approaches  
might prove useful to study it.

175 In the recent years, many computational tools (image analysis, data  
analysis, process based modelling and upscaling tools) were developed to  
help quantify and understand water dynamics in the soil-plant system. Some  
of these tools were developed to work together, or at least be compatible.  
180 However, for the uninformed researcher, they might seem disconnected,  
forming a collection of tools with, at best, a common target (plant-water  
relation exploration) but unrelated to each other.

The overall objective of this paper is to draw and discuss the role of a  
functional landscape of interconnected experiments and models for the study  
of soil-plant water relations. It is articulated as 3 sub-objectives: (i) to inform  
185 readers about existing procedures and tools used for the quantification of  
water flow at the organ, root system and plant population scales, as well as  
their interconnections forming a comprehensive, though non-exhaustive,  
network, (ii) to provide examples of studies combining experiments,  
analytical and modelling tools in this network, motivating the use of such  
190 approaches to enhance interpretations of available and future data, and (iii)  
to identify gaps in the network and argue for a better integration of future  
tools in this workflow with appropriate experiment and model design. A web  
interface was developed to help researchers use the network: it is available  
at [https://plantmodelling.shinyapps.io/water\\_network/](https://plantmodelling.shinyapps.io/water_network/).

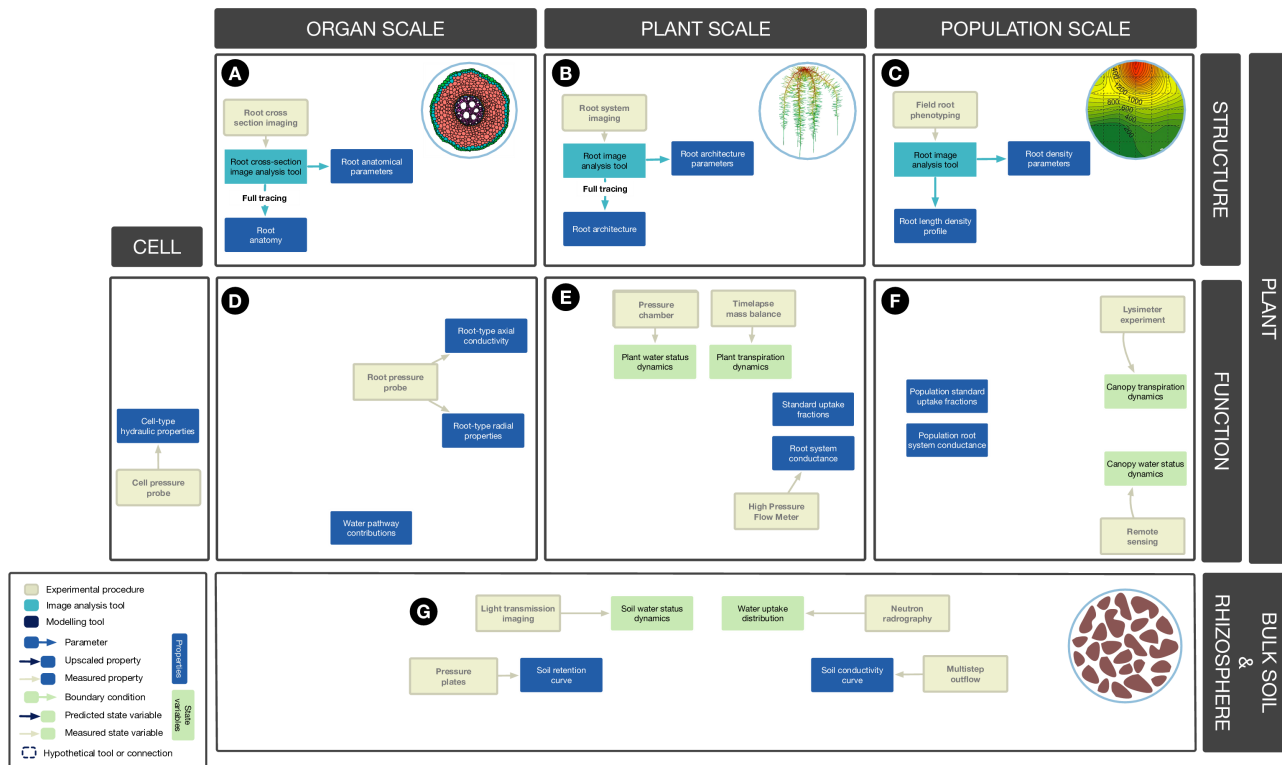

195 **Figure 1: Quantifying water relations in the soil plant system.** Tools, properties and state variables used to quantify: **(A)** the structure of root organ; **(B)** the structure of root system; **(C)** the structure of root profiles; **(D)** the water flow at the organ scale (root section); **(E)** the water flow at the plant scale (root system); **(F)** the water flow at the population scale; **(G)** the water flow in the soil. Without appropriate tools, variables of interest, scales and even plants and their environment seem disconnected.

## 200 Connecting the dots between research tools

205 Through four examples, we illustrate how the dots, consisting in apparently scattered data and tools, can be connected together in a comprehensive network. These examples span over the different scales mentioned above (organ, root system and population) and for all of them, we present data that can be obtained experimentally, technical limitations that need to be overcome and computational tools readily available. In all these examples, we focus on the soil-root water relation specificities at different scales, except for one where an architectural root growth model is introduced.

## Water flow at the root cross section scale

210 Different tools and techniques exist to quantify root structural properties at  
the organ scale. Histology and microscopy techniques enable precise  
observation of root anatomical structures (the interconnected network of  
cells). For instance, staining or fluorescence microscopy can be used to  
215 acquire images of the organization of different cell types within roots and the  
nature of cell walls [19]. Different image analysis tools are then available to  
extract quantitative information out of these images. On the one hand,  
CellSet [20] is currently the only tool that enables a complete digitization of  
the entire cell network. As an output, each single cell is represented by a set  
of connected edges and nodes. Unfortunately, depending on the image  
220 quality, the unautomated part of the procedure can be time-consuming. On  
the other hand, RootScan [21], PHIV-RootCell [22] and RootAnalyzer [23]  
are fully automated tools that can quantify anatomical properties (such as  
the number of cells or the mean size of each cell type) but do not provide a  
digitized cell network.

225 As a part of the functional layer, cell hydraulic properties are hard to estimate  
as water fluxes are difficult to measure at this scale. The cell pressure probe  
enables this estimation from measurements of water pressure relaxation  
times of individual cells, at a high time cost [4,24]. Osmotic pressure can be  
measured using nanoliter osmometer [25] or scanning electron microscopy  
230 [26]. However, the latter is expensive and generally not part of the standard  
equipment of a plant physiology laboratory. At the organ scale, the root  
pressure probe enables the measurement of axial and radial conductivities  
of root segments [3] and junctions to the stem [27]. Some properties of the  
system can hardly be determined experimentally such as the partitioning of  
235 water pathways across cell layers (apoplastic or cell-to-cell) (Barzana et al,  
2012).

Detailed root cross-section anatomical descriptions and a minimal set of  
empirical cell hydraulic properties (e.g. permeability of cell walls and  
membranes) enables the simulation of water flow across root cross sections.  
240 Like at other scales, water flow in the system is solved using transfer  
equation with boundary water pressures and conductances as input  
parameters. Such a model can estimate the equivalent hydraulic conductivity  
of the root cylinder as well as the partitioning of water flow between  
apoplastic and symplastic compartments of the system. For instance, by  
245 combining measurements of cell and root permeability with a hydraulic  
model, [28] demonstrated that water flow is primarily apoplastic in lupin roots.

250 A recent study took advantage of these computational tools to estimate the contribution of pearl millet root types to water uptake. Five types were identified based on cross-section anatomy: primary roots, crown roots and 3 types of lateral roots [29]. A cross-section was thoroughly digitized for each type of root using CellSet [20] (fig. 2A). Root axial hydraulic conductances were estimated using the simplified model of Hagen-Poiseuille (fig. 2B), based on measured xylem vessels dimensions. The digitized root anatomical network served as input for a mechanistic model of radial water flow in roots, namely MECHA [30] (fig. 2C). The model was used to estimate the radial conductivity of a typical segment of each root type. In this example, different tools (image analysis and modelling) were combined to estimate radial and axial conductivities, based on easy-to-acquire experimental data (cross section images). While complementary measurements of root hydraulic properties will always remain an asset (e.g. in order to cross-validate the estimated properties), this method opens the way to high-throughput estimations of root hydraulic properties.

255

260

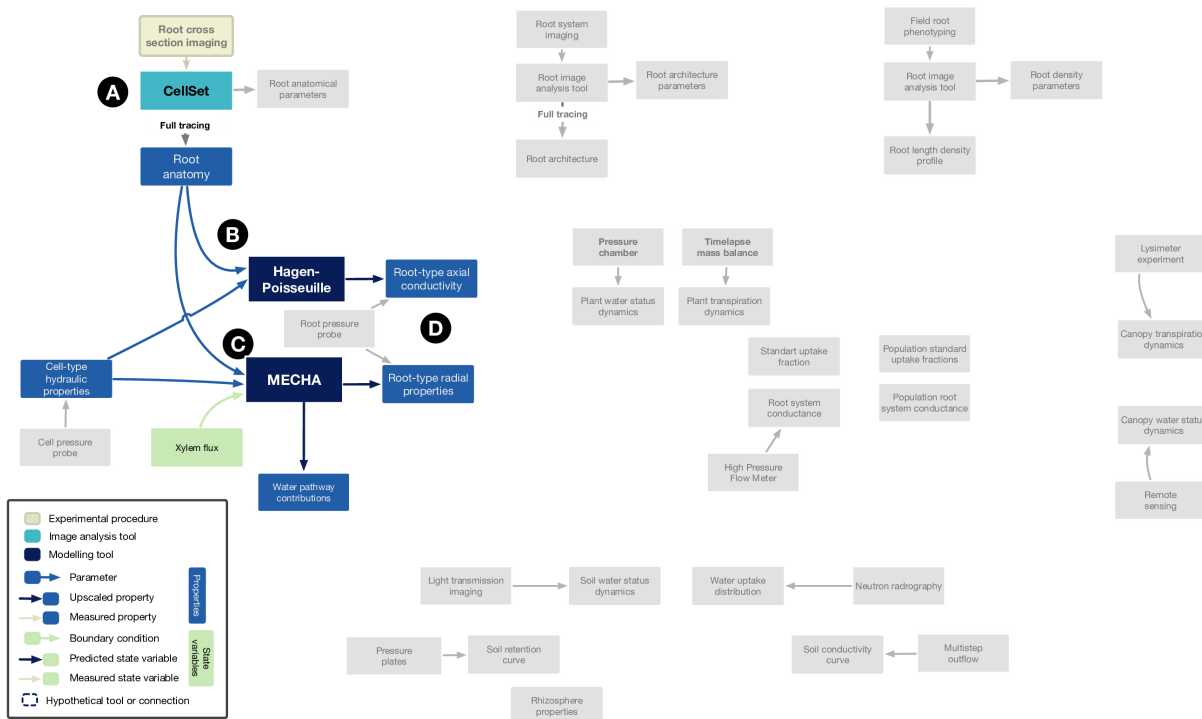

265 **Figure 2: Details of the connected dots to compute the hydraulic properties of the different root types of pearl millet.** Colored parts are the tools, models, properties and state variables used in the approach. Specific tools names were added where relevant. See text for details. A: CellSet, B: Hagen-Poiseuille, C: MECHA, D: Output of the different models



## Root system architecture

270 Unlike plant cells, the root system of annual crops has a convenient  
macroscopic scale and all elements (roots) are visible to the human eye.  
However, the main difficulties faced when retrieving the root system  
275 architecture are the hidden nature of this part of the plant, the large number  
of elements that can possibly overlay and the fragility of the smallest roots,  
making the full excavation of a complete intact root system particularly  
difficult. Direct manual methods exist to measure single root architectural  
traits such as the angle of crown roots with a protractor [31] or with the  
basket method [32,33], the length of individual roots with a ruler [31,34] or a  
combination of several root architectural traits [31]. However, these manual  
methods do not give access to the full root architecture.

280 Several digital tools have been developed and are now widely used to  
access root architectural traits, mostly from images of root system grown in  
specific experimental setups (see [35] for a review of existing root  
phenotyping strategies). These image analysis tools are listed in  
[www.plant-image-analysis.org](http://www.plant-image-analysis.org) and will not be detailed here (Lobet et al.  
2013, Lobet 2017). The only point to underline is that each tool generally  
285 corresponds to a specific growth medium and image capture technique (eg:  
RooTrak applies to root system growing in 3D and imaged with X-ray Micro  
Computed Tomography [36]. While some of these tools have been designed  
to retrace a full root system architecture (often with an important manual  
input), many of them only extract some root architectural traits (eg. mean  
290 lateral root length, number of seminal roots, crown root emergence angle...  
). Furthermore, even with the use of specifically designed image analysis tools,  
whole root system digitization becomes time consuming as soon as the  
plants are several weeks old. Therefore, subsequent tools are needed to  
reconstruct full root system architectures from extracted root traits.

295 Root architecture models, such as SimRoot [37], RootBox [38], RootTyp [39],  
ArchiSimple [40], OpenSimRoot [41] or CRootBox [42], are designed to  
simulate root systems from a limited number of traits, given as input  
parameters. The major interest of root architectural models is to generate a  
large number of contrasted root system architectures. Root system modeling  
300 enables the exploration of several variants for the same mean traits and the  
simulation of contrasted architectures, even from synthetic datasets. These  
contrasting architectures can then be tested in different scenarios, to identify  
traits that would be beneficial in challenging environments.

305 An example that illustrates how root architecture models can be applied to interpret experimental data of other root zone processes is given by Schnepf et al. (2016). Those authors developed a 3D model of the development of mycorrhizal root systems. The model was designed to simulate primary and secondary root infection with arbuscular mycorrhizal (AM) fungi as well as growth of external fungal hyphae in soil. It was calibrated using root architectural data obtained from pot experiments of *Medicago truncatula*, with and without mycorrhizal inoculum of the AM fungus *Rhizophagus irregularis* BEG 158. In those pots, AM root colonization was determined under a compound microscope and the abundance of *R. irregularis* hyphal biomass was determined using real-time PCR. The root system architecture, however, could not be parameterised from those pot experiments. The authors re-used published images from a previous study [43] (fig. 3A) and re-analysed them with the image analysis tool RootSystemAnalyzer [44] (fig. 3B). The traits extracted with RootSystemAnalyzer served as parameters for the RootBox model (fig. 3C) [38] which was used to simulate the root system development of mature plants, together with the arbuscular mycorrhizal fungi. This example highlights how published data can be reused to obtain input parameters for modelling. The current literature is filled with similar resources, opening up numerous opportunities. It also highlights the importance of sharing raw experimental data (in this case the images).

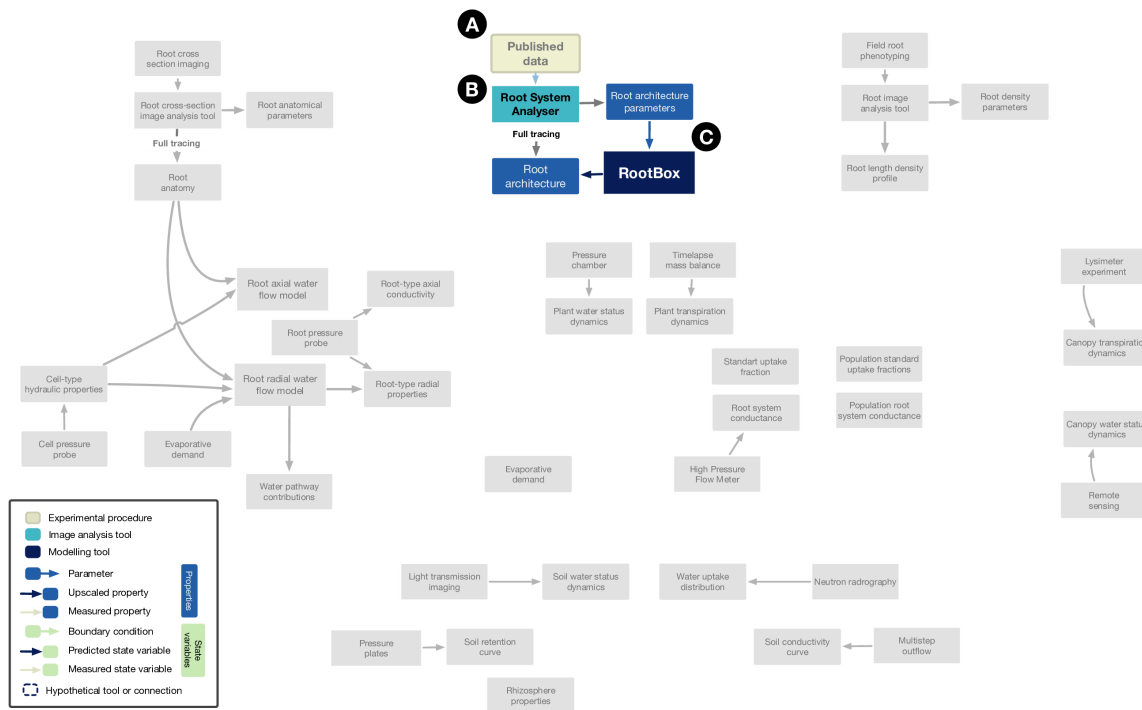

325 **Figure 3: Details of the connected dots for root system architecture generation.** Colored parts are the tools, models and properties used in the approach. Specific tools names were added where relevant. See text for details. A: Published data, B: Root System Analyzer, C: RootBox

## Water flow in the root system

330 At the root system scale, understanding which root traits positively influence  
plant water uptake dynamics for a given pedo-climatic situation remains an  
important research question. Ideotypes have been proposed, but are always  
335 tied to a specific environment [45–49]. Different traits, either functional or  
structural, have been found to maximize the final crop yield depending on  
the environment [50]. Ultimately, we need more than single traits or final  
yield to have a better understanding of plant-environment interactions. We  
need to understand how water flow within the plant is dynamically regulated,  
both spatially and temporally. Unfortunately, accurately measuring water flow  
is often the limiting step of the experimental pipeline. Several techniques  
340 exist to dynamically measure changes in soil water content, such as X-ray  
computed tomography [51], Electrical Resistivity Tomography [52], neutron  
tomography [53–56], light transmission imaging [57] or Magnetic Resonance  
Imaging [58–60]. These techniques can be deployed for a relatively high  
number of plants. However, due to water capillary flow within the soil  
domain, observed changes in soil water content are rarely (if never) a direct  
345 indication of the location of root water uptake. Water uptake rate itself can be  
estimated using more advanced but time-consuming lab techniques that use  
tracers, such as deuterated water that is monitored using neutron  
radiography [61,62].

350 Functional-structural plant models (FSPM) are often used to decipher  
plant-environment relationships [7]. FSPMs couple a complete  
representation of the root system architecture (or whole plant or shoot) with  
functional properties. Their input parameters are both functional and  
structural. For FSPMs simulating soil-root interactions, hydraulic parameters  
355 can be obtained using a root pressure probe [63] or the outputs of organ  
scale models but, as stated earlier, are generally difficult to acquire. Thus  
they are frequently adapted from the available literature. Rhizosphere  
hydraulic properties can also be coupled to FSPM [64] and would constitute  
a central component of plant water availability [16]. Rhizosphere properties  
are however difficult to parametrize, and would display complex temporal  
360 dynamics [65]. The FSPM structural input consists of an explicit  
representation of the root architecture (see Root system architecture section  
and the related previous case study). Together with the root system  
geometry, hydraulic properties define the root system hydraulic architecture  
[11] and are critical for water stress determination [66,67].

365 Water-related FSPMs provide a exhaustive description of the root water  
relations (uptake rates, water potentials, etc.) in both space and time. Thus,

370 they constitute an important way to integrate different types of information about properties of the root system and soil state variables in the root zone, which can be obtained experimentally, and to translate this information into a distributed pattern of water flows and local state variables (e.g. water potentials at the soil-root interface) within the root zone. The latter type of information is, as of today, hardly accessible experimentally. An exhaustive review of FSPMs related to water flow can be found in Ndour et al. [68].

375 FSPMs can also be used in so-called *inverse modelling* studies. In such case, the output of the model is known and the model is used to estimate one of the input parameters. For instance, the most likely distribution of root hydraulic properties (that are usually assumed to be age- and order-dependent) can be estimated using a soil-root water flow model and laboratory measurements [69]. In this study, measurements of local water  
380 fluxes were obtained from neutron radiography at different locations in the root system [56]. As the experiment took place in a rhizotron, the root system could be fully digitized using an appropriate image analysis tool, which provided accurate information on the root system topology and positions in space (fig. 4A and see also Root system architecture section). Water uptake  
385 patterns and axial flows within the root system could then be modelled by applying existing water flow equation resolution algorithms [70,71] to the segmented root system (fig. 4B). The water flow model requires boundary conditions that need to be estimated or measured. In this case, the water potential at the root collar was measured using a pressure probe and  
390 root-soil interface water potentials were estimated from water content distribution.

Such a coupling allowed the authors to estimate the parameters of the root hydraulic conductivity function that best fitted the water flow measurements (fig. 4C and D). These parameters then allowed for novel predictions  
395 including water uptake and axial flow distributions everywhere in the root system and not only at observed segments, in homogeneous and heterogeneous soil conditions or under various evaporative demands.

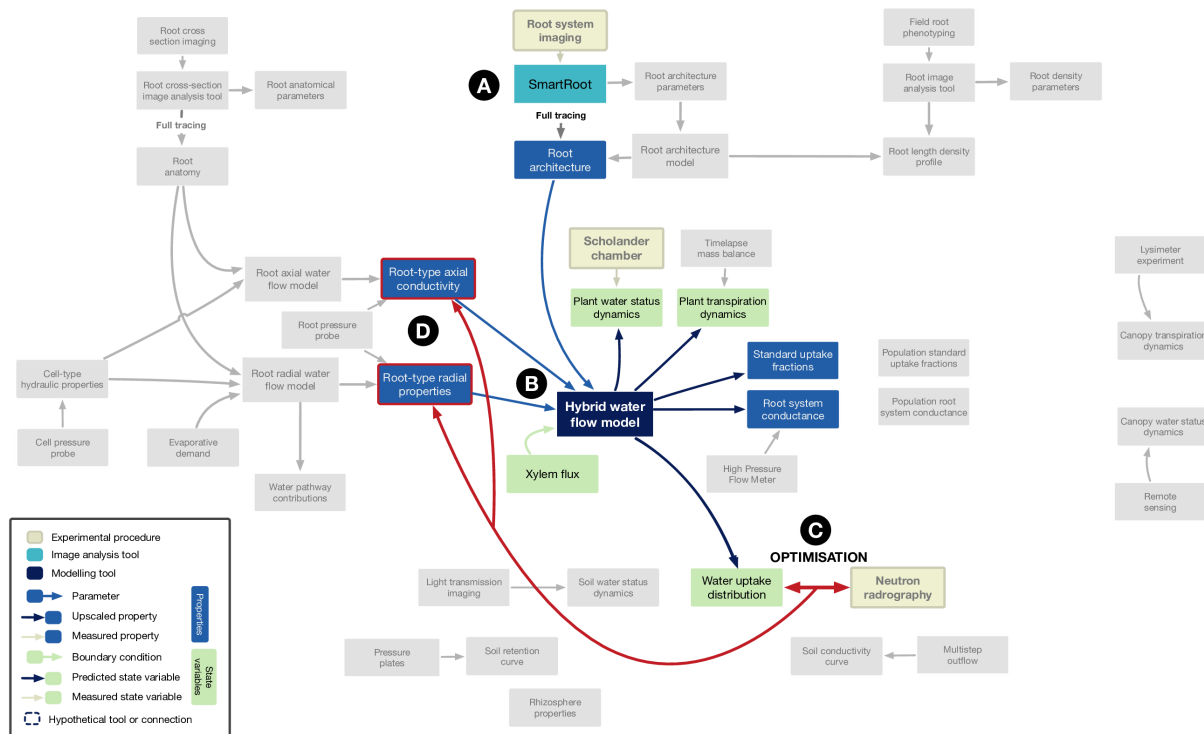

**Figure 4: Details of the connected dots for estimating root conductivities from experimental observations through inverse modelling.** Colored parts are the tools, models and inputs used in the approach. Specific tools names were added where relevant. The red arrow indicate the optimisation step used in the inverse modelling. The red boxes highlight the variables evaluated using the inverse modelling. See text for details. A: SmartRoot, B: Hybrid water flow model, C: Optimisation, D: Root hydraulic properties

## Water flow at the population scale

The population level is a pivotal scale. It interfaces with general circulation models that represent, among others, the circulation of the atmosphere and its interaction with land surface for climate forecasting [72]. It also introduces variables of critical agronomic interest like crop yield per acre [73]. Like at other scales, robust predictions of the system behaviour require the ability to quantify system properties and a proper validation, here involving field scale observations of water fluxes. These fluxes can be estimated with heavy instrumentation and data analytics, for instance using eddy covariance flux towers [74] or soil moisture sensors grids [75].

415 Structural root information can be obtained using either destructive sampling,  
such as core sampling [76], monolith excavation [77], trenches [78] or root  
crown excavation [79], or non-destructive ones, such as minirhizotrons [80].  
None of these techniques allows for direct reconstruction of the root system,  
but rather extract synthetic metrics such as a root length density profile, or  
root crown data (angles, numbers etc.). Some root architectural traits can be  
420 derived from data obtained with these techniques using root architecture  
models and inverse modeling, as stated above [81,82]. Functional plant  
properties, such as root system and stomatal conductances, which  
coordinate shoot water supply [13] and underground water uptake  
distribution [83], can be characterized on individual plants with  
425 low-throughput instruments, such as the high-pressure flowmeter [84] or the  
porometer [85], then scaled to the population level using the planting density.  
The main limitation of plant measurement in the field is often the limited  
sample size, that might not reflect the general behaviour of the system. The  
same critique can be made about soil hydraulic properties estimated on  
430 small and (un)disturbed samples as they may not be representative of the  
hydrological behaviour at the population level [86,87].

These limitations motivate the use of effective descriptions of population  
water relations, tailored for this specific scale, such as the transpiration  
correction for “soil water stress” [88] or one-dimensional soil water and  
nutrient transfer principles [89]. Two major methodologies address the  
435 parametrization of effective field water relations. First, the artificial neural  
network approach takes advantage of the availability of large amounts of  
data to train a model. It was used to predict canopy water fluxes from state  
variables such as the vapor pressure deficit and soil moisture [90,91].  
Second, the inverse modelling approach (as described previously) builds on  
440 state-of-the-art models to simulate spatio-temporal series of the system  
state. The model parameter values producing simulated series that best  
match field observations are considered optimal and representative of the  
system behaviour. This approach was used to connect models of soil and  
plant water flow to observations of soil moisture and transpiration in an  
445 almond orchard, in order to estimate soil and plant properties, as well as the  
hardly measurable leaching of water below the root zone [92]. Numerous  
variables can be used for inverse modeling, such as soil water content,  
isotopes distributions or root length density profiles.

450 Going one step further, simplistic macroscale models can be derived from  
equations of water flow at a lower scale, offering an interesting trade-off  
between functional simplicity and realism. This type of model involves  
scale-consistent properties and processes. A cross-validation is thus  
possible between parameter values estimated directly at the macroscale of

455 interest (e.g. plant population hydraulic conductance per surface area) and  
derived from the lower scale (e.g. upscaled values derived from root  
architectural and hydraulic properties). In order to parametrize such a  
macroscale model of water dynamics in the soil-wheat system, Cai et al. [15]  
460 combined one-dimensional process-based models of water flow (i) in soil  
(Hydrus-1D, [93]) (fig. 5A), (ii) in roots [94], and (iii) in leaves with an  
isohydric constraint on transpiration [95] (fig. 5B). Regarding soil properties,  
soil water retention curves were fitted on simultaneous soil water content  
and pressure head measurements [96] with the software RETC [97] (fig. 5C).  
465 However, the parameters of the soil hydraulic conductivity curve were not  
experimentally determined (fig. 5D). The vertical distribution of roots in the  
field (root length density profiles over time) was extracted from *in situ*  
rhizotube pictures, with the software Rootfly [98] (fig. 5E). Its relative  
distribution is typically used as proxy for the water uptake distribution in  
uniformly wet conditions [99,100] (fig. 5F). Plant hydraulic properties could  
not be observed *in situ* for the wheat population (fig. 5F-G).

470 An inverse modelling strategy was therefore used to find the “optimal” soil  
and plant hydraulic properties (fig. 5H) that best fitted the observed soil  
water status dynamics. The optimized plant hydraulic parameters were  
cross-validated with properties at the individual plant scale. Conductance  
475 parameters obtained for winter wheat at the same stage of maturity using the  
hydraulic architecture approach turned out to be consistent with the inversely  
modeled properties at the population scale [15].

In order to limit the number of parameters, this approach requires the  
480 assumption that system properties are time invariant (e.g. soil hydraulic  
conductivity curve). Because root system conductance tends to scale with  
root length, the root conductance per unit root length was assumed invariant  
in order to accommodate for root growth. Such a constraint also matters  
when accounting for the spatial heterogeneity of root development under  
different soil/microclimate environments in macroscale simulations [101].



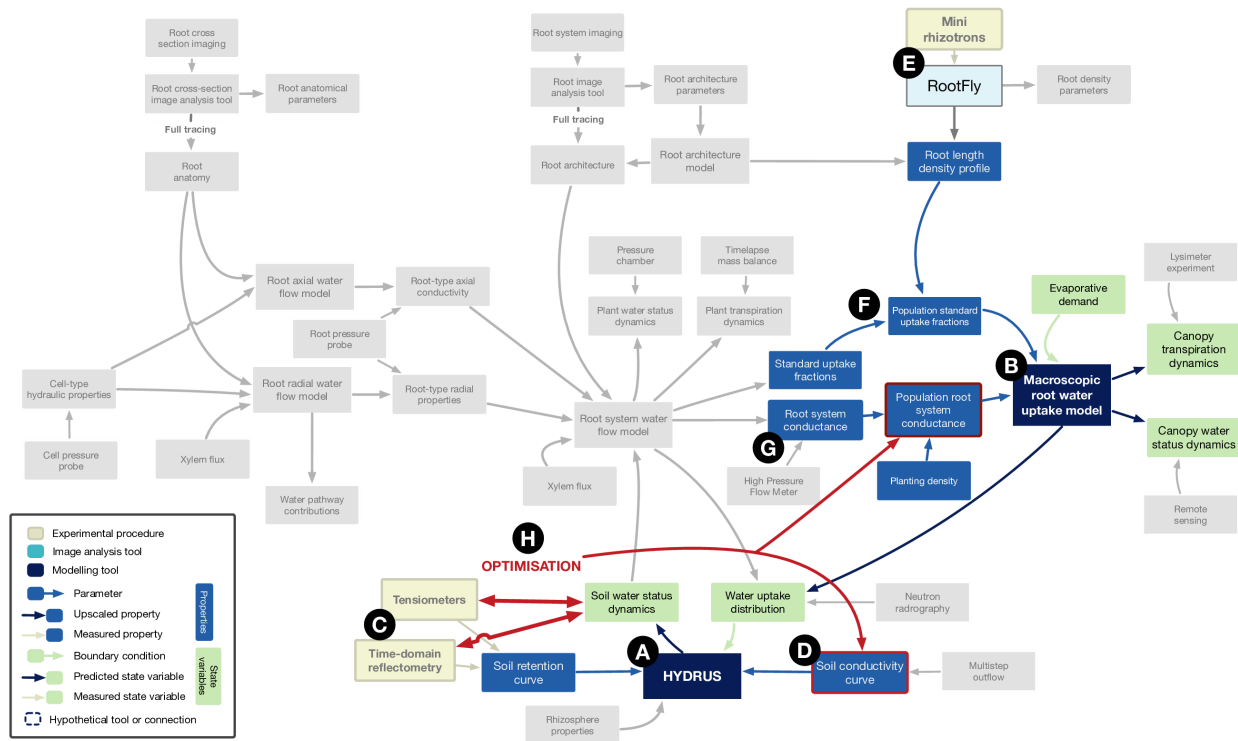

485 **Figure 5: Details of the connected dots for estimate soil and plant-scale conductivities through inverse modelling.** Colored parts are the tools, models and inputs used in the approach. Specific tools names were added where relevant. The red arrow indicate the optimisation step used in the inverse modelling. The red boxes highlight the variables evaluated using the inverse modelling. See text for references to letters A-H.

## Discussions and perspectives

490 Many computational tools exist to better understand water dynamics in soil-plant systems. These tools span different scales (organ, plant and population), types (image analysis, data storage, simulation models) and computational languages (Python, Fortran, C++, C#, Java, ...). For the average user, this multitude might seem overly complex and hard to understand. Yet, most of the tools could work together and form a continuous network. Using this network, experimental data can be transferred from scale to scale and generate new insights (fig. 6, and case studies developed above). Modelling tools currently present in the network are listed in table 1. This list is non-exhaustive as the objective of this paper is less to review

495



500 existing tools than to encourage their integration in order to enhance our  
understanding soil-plant water relations. For image analysis tools, we refer  
the reader to the [www.plant-image-analysis.org](http://www.plant-image-analysis.org) database [102,103].

505 We created an interactive online visualization of the network, which contains  
links to the different tools. We also added a submission form, such as the  
community could update the network with new (or missing) tools. The online  
visualisation tool (open-source) is available at  
[https://plantmodelling.shinyapps.io/water\\_network/](https://plantmodelling.shinyapps.io/water_network/)

## Identifying gaps in the tool network

510 Analogies between tool connectivity patterns at each scale in figure 6 reveal  
the existence of network gaps (represented by the dashed lines in fig.6). Yet,  
these gaps should not be filled just for the sake of symmetry. Here, we  
analyze what the function of filling these gaps could be.

515 The plant “structure” row in Fig. 6 has the most striking pattern, with imaging  
techniques systematically feeding image-analysis tools. These tools extract  
two types of data: (i) explicit spatial structures (e.g. RSML, MTG), and (ii)  
structural pattern properties (e.g. growth rates, branching rates). At the  
population and plant scales, root development models [39,104] offer the  
possibility to convert root pattern properties into predicted root structures.  
520 While root anatomical patterns can be automatically characterized by image  
analysis tools such as PHIV-RootCell [22], no root anatomy development  
model exists at that scale. In the perspective of generating a mechanistic  
model of a whole plant from the cell scale [105], a root development model  
would become essential. It would fulfill two main functions: (i) conducting  
predictions and test hypotheses related to root anatomical development, and  
525 (ii) allowing the spatial and temporal interpolation of root anatomies between  
experimental observations.

530 Models using explicit root anatomical structures to test hypotheses about  
hormone signalling [106], tropisms [107] or radial water flow [30] have  
emerged lately. However, models of axial water flow remain largely  
underexplored. In the broadly used Poiseuille-Hagen model, only the  
quantity and diameter of xylem vessels are accounted for. Yet, it is known for  
a long time that xylem porous plates, pit membranes and persistent primary  
cross-walls limit root axial conductivity [108–113] and affect the partitioning  
of water uptake among root types [27].

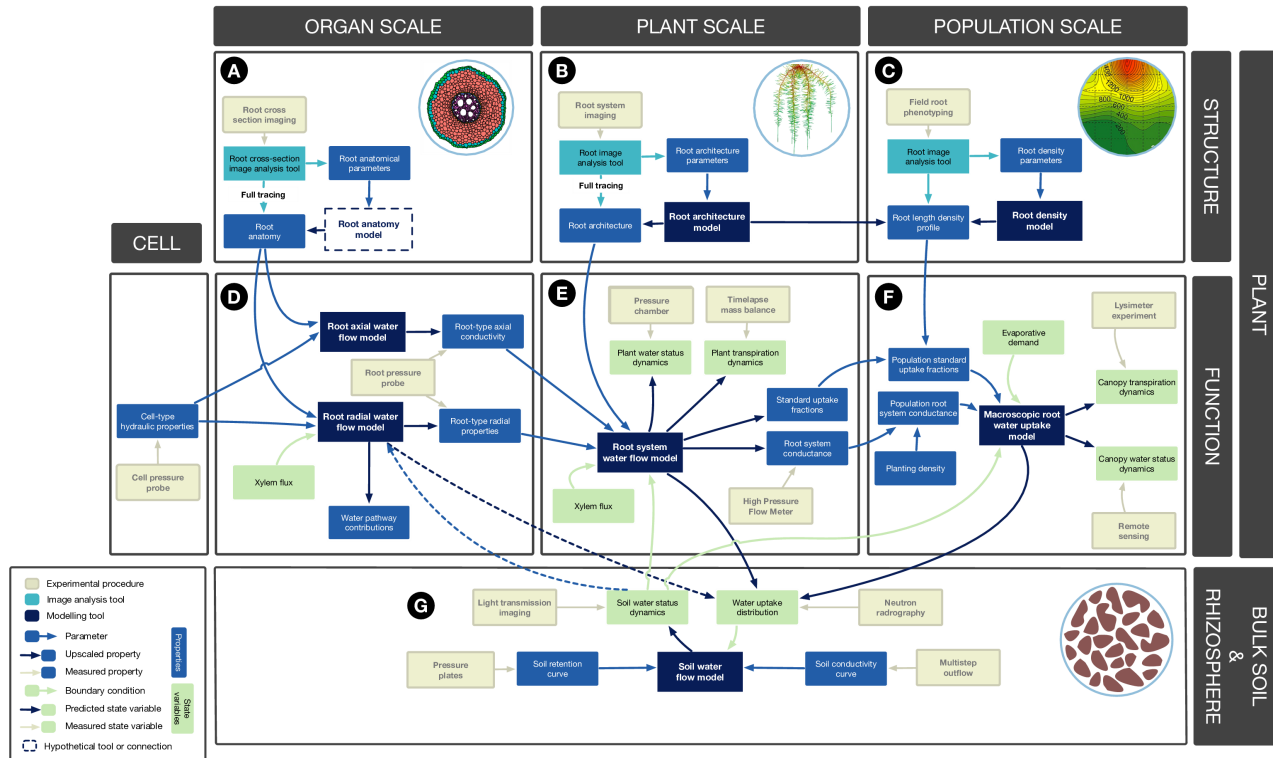

535 **Figure 6: Full network of tools and data used to quantify water flow in the soil plant system.** The network connects experimental procedures, computational tools and data related to water flow in the soil-plant system. It is organised by scales (organ, plant and population) and by the types of information (structural or functional, see text for details).A. Tools to quantify the water flow at the organ scale (root section). B. Tools to quantify the structure of root organ. C. Tools to quantify the water flow at the plant scale (root system). D. Tools to quantify the structure of root system. E. Tools to quantify the water flow at the population scale. F. Tools to quantify the structure of root profiles. G. Tools to quantify water flow in the soil.

540

545 Experimental methods and numerical tools to represent numerically xylem anatomy and hydraulic properties are missing and may reveal a complexity that is neglected so far. Such numerical representations of xylem vessel structure and hydraulic properties in the axial direction would allow the use of alternatives to Hagen-Poiseuille law [114,115]. Lewis and Boose point out that “Ideally, the exact solutions should be used to calculate [volume flow rate] in xylem conduits, but the equations are difficult to solve without the aid of computer” [115]. Computer availability is no longer an issue and we expect that explicit models of xylem flow will soon emerge. We expect that filling this gap will shed light on the role of cross-walls in the generation of root hydraulic types, and in root-leaf preferential connectivity [116].

550

Similarly, at the soil-root interface, imaging tools are now available to precisely observe soil processes at the scale of the soil particle and root hair

555

[117]. Connecting such soil-root interface geometrical descriptions to root hydraulic anatomical models would open new avenues to understand how root hairs enhance plant water availability in dry soils [118].

**Table 1: List of modelling tools fitting into the network.** For image analysis tools, we refer the reader to the [www.plant-image-analysis.org](http://www.plant-image-analysis.org) website

| Type                    | Scale                    | Name         | Reference |
|-------------------------|--------------------------|--------------|-----------|
| Functional              | Radial water flow        | MECHA        | [30]      |
| Functional              | Root system water flow   | R-SWMS       | [119]     |
| Functional - structural | Root system water flow   | PlaNet-Maize | [120]     |
| Functional - structural | Root system water flow   | OpenSimRoot  | [121]     |
| Functional              | Root system water flow   |              | [122]     |
| Functional              | Soil water flow          | HYDRUS       | [93]      |
| Functional              | Soil water flow          | RSWMS        | [119]     |
| Structural              | Root system architecture | CRootBox     | [123]     |
| Structural              | Root system architecture | ArchiSimple  | [39]      |
| Structural              | Root system architecture | RootTyp      | [124]     |
| Structural              | Root system architecture | DigR         | [125]     |
| Structural              | Root system density      |              | [126]     |

615

Soil water fluxes were only explicitly considered in the last case study (population scale). In other case studies, soil was either neglected (organ and plant scales) or included as static boundary conditions. However, in all cases, a model of water flow in the soil domain can be coupled to the plant water flow. Such analyses were for instance carried out at the plant level [41,119,127,128] or the population level [129,130]. Such models may incorporate multiple soil characteristics such as macropores [131], solute convection-dispersion [132] or specific rhizosphere properties [133,134]. For an extensive review of existing soil models, we refer the reader to Vereecken et al. [135].

620

## Limitations and future developments

625 Simulating water fluxes in roots with this collection of tools can either help  
understanding plant water relations as a main goal or be a tool for further  
application. These tools could also be used as a side usage of a dataset  
obtained for other purposes. The advent of imaging in plant sciences and the  
huge progress made in image analysis allow generating high quality  
quantitative data of plant structure, suitable for model parameterization.  
630 Many models exist at different scales and we highlighted the many  
possibilities to combine these tools. This set of tools greatly increases the  
potential of interpretation of experimental data. Yet many authors still publish  
rich datasets without using modelling tools to interpret them. Using models is  
not trivial for a large part of the plant science community. Coupling several  
tools and models together is still rarely applied. Several requirements seem  
essential to facilitate the use of this pipeline whenever it may add value to  
635 the data.

A lot of image analysis tools and models flourish in the water transport  
domain. Thanks to the wide breadth of scientific literature available (scientific  
papers, reviews, websites...), developers are usually aware of already  
existing tools and keep in mind to justify the interest of their tool in this  
640 landscape. However, we suggest that further efforts should be made to  
render the tools compatible with existing ones. In this context, the existence  
of several tools at the same place of the network (eg. RootTyp and  
CRootBox for root architecture simulation) is not conflicting. Each one can  
best suit one scale or specific situation. In our opinion, special attention  
645 should be paid to the data format. Indeed, the output data format of  
upstream tools must be compatible with the input format required by  
downstream ones. If this is not the case, easy-to-handle tools must exist to  
convert these data. The multiplication of formats and the need to convert  
data from one type to another may discourage the use of some of the  
650 models. In this respect, the existence of standard formats, such as the Root  
System Markup Language [5] for root architecture, smooths the  
interconnection between tools.

When a new tool is created, the documentation of its potential connections  
with existing ones (e.g. in the user guide) would benefit the whole network. It  
655 is indeed expected that the knowledge and the use of all modelling tools will  
increase. It also underlines the need to keep the models and their  
documentation updated. Pioneering tools sometimes get outdated by new  
ones that do similar tasks but that are more user-friendly, faster, use the  
latest formalisms, or are better connected with newly existing tools.

660 Therefore, either the interconnection between tools needs to be part of a  
huge maintenance effort for already existing tools, or the acceptance that  
pioneering tools are doomed to sink into oblivion.

665 Making the different tools freely available to the community is also a key  
aspect in their long term maintenance [103]. Many different repositories and  
licences exist so that everyone should be able to find a combination that  
suits their (and their institution's) needs. Free access to the tools' source  
codes would indeed greatly facilitate their evolution, reproducibility of the in  
silico experiments and allow future developers to interconnect them more  
easily.

670

## Acknowledgments

675 The authors would like to thank Jennifer Brophy, Heike Lindner and Thérèse  
LaRue (Carnegie Institution for Science, Stanford, CA) for their useful  
comment on the first version of manuscript. This work was also supported by  
the Belgian French community ARC 16/21-075 project. VC was also  
supported by the Interuniversity Attraction Poles Programme-Belgian  
Science Policy (grant IAP7/29). During the preparation of this manuscript,  
FM was supported by the "Fonds National de la Recherche Scientifique"  
(FNRS) of Belgium as a Research Fellow and is grateful to this organization  
for its financial support.

680

## Author contributions

|                            | SP | VC | FM | XD | MJ | DL | LP | AS | JV | GL |
|----------------------------|----|----|----|----|----|----|----|----|----|----|
| Conceptualization          |    |    |    |    |    |    |    |    |    |    |
| Visualization              |    |    |    |    |    |    |    |    |    |    |
| Writing - draft            |    |    |    |    |    |    |    |    |    |    |
| Writing - review / editing |    |    |    |    |    |    |    |    |    |    |

695

## References

700

705

710

715

720

725

730

735

1. Couvreur V, Vanderborght J, Javaux M. A simple three-dimensional macroscopic root water uptake model based on the hydraulic architecture approach. *Hydrol Earth Syst Sci. Copernicus GmbH*; 2012;16: 2957–2971.
2. Tsuda M, Tyree MT. Plant hydraulic conductance measured by the high pressure flow meter in crop plants. *J Exp Bot. Soc Experiment Biol*; 2000;51: 823.
3. Steudle E, Jeschke WD. Water transport in barley roots : Measurements of root pressure and hydraulic conductivity of roots in parallel with turgor and hydraulic conductivity of root cells. *Planta*. 1983;158: 237–248.
4. Steudle E. Water-relation Parameters of Individual Mesophyll Cells of the Crassulacean Acid Metabolism Plant *Kalanchoë daigremontiana*. *Plant Physiol*. 1980;66: 1155–1163.
5. Lobet G, Pound MP, Diener J, Pradal C, Draye X, Godin C, et al. Root System Markup Language: Toward a Unified Root Architecture Description Language. *Plant Physiol. American Society of Plant Biologists*; 2015;167: 617–627.
6. Godin C, Costes E, Sinoquet H. A Method for Describing Plant Architecture which Integrates Topology and Geometry. *Ann Bot*. 1999;84: 343–357.
7. Godin C, Sinoquet H. Functional-structural plant modelling. *New Phytol. Blackwell Science Ltd*; 2005;166: 705–708.
8. Cattivelli L, Rizza F, Badeck F-W, Mazzucotelli E, Mastrangelo AM, Francia E, et al. Drought tolerance improvement in crop plants: An integrated view from breeding to genomics. *Field Crops Res*. 2008;105: 1–14.
9. Sperry JS, Hacke UG, Oren R, Comstock JP. Water deficits and hydraulic limits to leaf water supply. *Plant Cell Environ*. 2002;25: 251–263.
10. Draye X, Kim Y, Lobet G, Javaux M. Model-assisted integration of physiological and environmental constraints affecting the dynamic and spatial patterns of root water uptake from soils. *J Exp Bot*. 2010;61: 2145–2155.
11. Lobet G, Couvreur V, Meunier F, Javaux M, Draye X. Plant water uptake in drying soils. *Plant Physiol*. 2014;164: 1619–1627.
12. Schoppach R my, Wauthélet D, Jeanguenin L, Sadok W. Conservative water use under high evaporative demand associated with smaller root metaxylem and limited trans-membrane water transport in wheat. *Funct Plant Biol. CSIRO PUBLISHING*; 2013; Available: <http://www.publish.csiro.au/?paper=FP13211>
13. Alsina MM, Smart DR, Bauerle T, de Herralde F, Biel C, Stockert C, et al. Seasonal changes of whole root system conductance by a drought-tolerant grape root system. *J Exp Bot*. 2011;62: 99–109.
14. Cox PM, Huntingford C, Harding RJ. A canopy conductance and photosynthesis model for use in a GCM land surface scheme. *J Hydrol*. 1998;212-213: 79–94.
15. Cai G, Vanderborght J, Couvreur V, Mboh CM, Vereecken H. Parameterization of Root Water Uptake Models Considering Dynamic Root Distributions and Water Uptake Compensation. *Vadose Zone J*. 2017;0: 0.
16. Carminati A, Schneider CL, Moradi AB, Zarebanadkouki M, Vetterlein D, Vogel H-J, et al. How

- the rhizosphere may favor water availability to roots. *Vadose Zone J. Soil Science Society*; 2011;10: 988–998.
- 740 17. Ahmed MA, Kroener E, Holz M, Zarebanadkouki M, Carminati A. Mucilage exudation facilitates root water uptake in dry soils. *Funct Plant Biol. CSIRO PUBLISHING*; 2014;41: 1129–1137.
18. van Genuchten MT. A closed-form equation for predicting the hydraulic conductivity of unsaturated soils. *Soil Sci Soc Am J.* 1980;44: 891–898.
19. Costa G, Plazenet I. Plant Cell Wall, a Challenge for Its Characterisation. *Adv Biol Chem.* 2016;06: 70–105.
- 745 20. Pound MP, French AP, Wells DM, Bennet JM, Pridmore TP. CellSeT: Novel Software to Extract and Analyze Structured Networks of Plant Cells from Confocal Images. *Plant Cell. American Society of Plant Biologists*; 2012; Available: <http://www.plantcell.org/content/early/2012/03/30/tpc.112.096289>
- 750 21. Burton AL, Williams M, Lynch JP, Brown KM. RootScan: Software for high-throughput analysis of root anatomical traits. *Plant Soil. Kluwer Academic Publishers*; 2012;357: 189–203.
22. Lartaud M, Perin C, Courtois B, Thomas E, Henry S, Bettembourg M, et al. PHIV-RootCell: a supervised image analysis tool for rice root anatomical parameter quantification. *Front Plant Sci.* 2014;5: 790.
- 755 23. Chopin J, Laga H, Huang CY, Heuer S, Miklavcic SJ. RootAnalyzer: A Cross-Section Image Analysis Tool for Automated Characterization of Root Cells and Tissues. *PLoS One.* 2015;10: e0137655.
24. Hose E, Steudle E, Hartung W. Abscisic acid and hydraulic conductivity of maize roots: a study using cell- and root-pressure probes. *Planta. Springer-Verlag*; 2000;211: 874–882.
- 760 25. Malone M, Leigh RA, Tomos AD. Extraction and analysis of sap from individual wheat leaf cells: the effect of sampling speed on the osmotic pressure of extracted sap. *Plant Cell Environ.* 1989;12: 919–926.
26. Enns L. Solute concentrations in xylem sap along vessels of maize primary roots at high root pressure. *J Exp Bot.* 1998;49: 1539–1544.
- 765 27. Meunier F, Zarebanadkouki M, Ahmed MA, Carminati A, Couvreur V, Javaux M. Hydraulic conductivity of soil-grown lupine and maize unbranched roots and maize root-shoot junctions. *J Plant Physiol.* 2018; doi:10.1016/j.jplph.2017.12.019
28. Bramley H, Turner NC, Turner DW, Tyerman SD. Roles of morphology, anatomy, and aquaporins in determining contrasting hydraulic behavior of roots. *Plant Physiol.* 2009;150: 348–364.
- 770 29. Passot S, Gnacko F, Moukouanga D, Lucas M, Guyomarc'h S, Ortega BM, et al. Characterization of Pearl Millet Root Architecture and Anatomy Reveals Three Types of Lateral Roots. *Front Plant Sci.* 2016;7: 829.
- 775 30. Couvreur V, Faget M, Lobet G, Javaux M, Chaumont F, Draye X. Novel multiscale insights into the composite nature of water transport in roots [Internet]. *bioRxiv.* 2017. p. 147314. doi:10.1101/147314
31. Trachsel S, Kaeppler SM, Brown KM, Lynch JP. Shovelomics: high throughput phenotyping of maize (*Zea mays* L.) root architecture in the field. *Plant Soil.* 2010;341: 75–87.
32. Oyanagi A, Nakamoto T, Morita S. The gravitropic response of roots and the shaping of the root system in cereal plants. *Environ Exp Bot.* 1993;33: 141–158.



- 
- 780 33. Uga Y, Okuno K, Yano M. DRO1, a major QTL involved in deep rooting of rice under upland field conditions. *J Exp Bot.* 2011;62: 2485–2494.
34. Pritchard J, Barlow PW, Adam JS, Tomos AD. Biophysics of the inhibition of the growth of maize roots by lowered temperature. *Plant Physiol.* 1990;93: 222–230.
- 785 35. Paez-Garcia A, Motes CM, Scheible W-R, Chen R, Blancaflor EB, Monteros MJ. Root Traits and Phenotyping Strategies for Plant Improvement. *Plants.* 2015;4: 334–355.
36. Mairhofer S, Zappala S, Tracy SR, Sturrock C, Bennett M, Mooney SJ, et al. RooTrak: automated recovery of three-dimensional plant root architecture in soil from x-ray microcomputed tomography images using visual tracking. *Plant Physiol.* 2012;158: 561–569.
- 790 37. Lynch JP, Nielsen KL, Davis RD, JablOKow AG. SimRoot: Modelling and visualization of root systems. *Plant Soil.* Kluwer Academic Publishers; 1997;188: 139–151.
38. Leitner D, Klepsch S, Bodner G, Schnepf A. A dynamic root system growth model based on L-Systems. *Plant Soil.* Kluwer Academic Publishers; 2010;332: 117–192.
- 795 39. Pagès L, Bécel C, Boukcim H, Moreau D, Nguyen C, Voisin A-S. Calibration and evaluation of ArchiSimple, a simple model of root system architecture. *Ecol Modell.* Elsevier B.V.; 2013;290: 76–84.
40. Pagès L, Bécel C, Boukcim H, Moreau D, Nguyen C, Voisin A-S. Calibration and evaluation of ArchiSimple, a simple model of root system architecture. *Ecol Modell.* 2014;290: 76–84.
- 800 41. Postma JA, Kuppe C, Owen MR, Mellor N, Griffiths M, Bennett MJ, et al. OpenSimRoot: widening the scope and application of root architectural models. *New Phytol.* 2017;215: 1274–1286.
42. Schnepf A, Leitner D, Landl M, Lobet G, Mai TH, Morandage S, et al. CRootBox: a structural–functional modelling framework for root systems. *Ann Bot.* 2018; doi:10.1093/aob/mcx221
- 805 43. Bourion V, Martin C, de Larambergue H, Jacquin F, Aubert G, Martin-Magniette M-L, et al. Unexpectedly low nitrogen acquisition and absence of root architecture adaptation to nitrate supply in a *Medicago truncatula* highly branched root mutant. *J Exp Bot.* 2014;65: 2365–2380.
44. Leitner D, Felderer B, Vontobel P, Schnepf A. Recovering root system traits using image analysis exemplified by two-dimensional neutron radiography images of lupine. *Plant Physiol.* 2014;164: 24–35.
- 810 45. Pagès L. Links between root developmental traits and foraging performance. *Plant Cell Environ.* 2011;34: 1749–1760.
46. Lynch JP. Steep, cheap and deep: an ideotype to optimize water and N acquisition by maize root systems. *Ann Bot.* 2013;112: 347–357.
- 815 47. Dencic S. Designing a Wheat Ideotype with Increased Sink Capacity. *Plant Breed.* 1994;112: 311–317.
48. Wasson AP, Richards RA, Chatrath R, Misra SC, Prasad SVS, Rebetzke GJ, et al. Traits and selection strategies to improve root systems and water uptake in water-limited wheat crops. *J Exp Bot.* 2012;63: 3485–3498.
- 820 49. Guswa AJ. Effect of plant uptake strategy on the water–optimal root depth. *Water Resour Res.* 2010;46. doi:10.1029/2010wr009122
50. Tardieu F. Any trait or trait-related allele can confer drought tolerance: just design the right drought scenario. *J Exp Bot.* 2012;63: 25–31.
-



- 
51. Hainsworth JM, Aylmore L. The use of computer assisted tomography to determine spatial distribution of soil water content. *Aust J Soil Res.* 1983;21: 435.
- 825 52. Garré S, Coteur I, Wongleecharoen C, Hussain K, Omsunram W, Kongkaew T, et al. Can We Use Electrical Resistivity Tomography to Measure Root Zone Dynamics in Fields with Multiple Crops? *Procedia Environmental Sciences.* 2013;19: 403–410.
53. Carminati A, Moradi AB, Vetterlein D, Vontobel P, Lehmann E, Weller U, et al. Dynamics of soil water content in the rhizosphere. *Plant Soil.* 2010;332: 163–176.
- 830 54. Esser HG, Carminati A, Vontobel P, Lehmann EH, Oswald SE. Neutron radiography and tomography of water distribution in the root zone. *J Plant Nutr Soil Sci.* 2010;173: 757–764.
55. Tötze C, Kardjilov N, Manke I, Oswald SE. Capturing 3D Water Flow in Rooted Soil by Ultra-fast Neutron Tomography. *Sci Rep.* 2017;7: 6192.
- 835 56. Zarebanadkouki M, Kroener E, Kaestner A, Carminati A. Visualization of root water uptake: quantification of deuterated water transport in roots using neutron radiography and numerical modeling. *Plant Physiol.* 2014;166: 487–499.
57. Garrigues E, Doussan C, Pierret A. Water Uptake by Plant Roots: I – Formation and Propagation of a Water Extraction Front in Mature Root Systems as Evidenced by 2D Light Transmission Imaging. *Plant Soil.* 2006;283: 83–98.
- 840 58. Jahnke S, Menzel MI, van Dusschoten D, Roeb GW, Bühler J, Minwuyelet S, et al. Combined MRI-PET dissects dynamic changes in plant structures and functions. *Plant J.* 2009;59: 634–644.
- 845 59. Pohlmeier A. MRI in Soils: Determination of Water Content Changes Due to Root Water Uptake by Means of a Multi-Slice-Multi-Echo Sequence (MSME). *The Open Magnetic Resonance Journal.* 2010;3: 69–74.
60. Rascher U, Blossfeld S, Fiorani F, Jahnke S, Jansen M, Kuhn AJ, et al. Non-invasive approaches for phenotyping of enhanced performance traits in bean. *Funct Plant Biol.* 2011;38: 968.
- 850 61. Zarebanadkouki M, Kroener E, Kaestner A, Carminati A. Visualization of root water uptake: quantification of deuterated water transport in roots using neutron radiography and numerical modeling. *Plant Physiol.* 2014;166: 487–499.
62. Warren JM, Bilheux H, Kang M, Voisin S, Cheng C-L, Horita J, et al. Neutron imaging reveals internal plant water dynamics. *Plant Soil.* 2013;366: 683–693.
- 855 63. Steudle E, Rr O, Schulze E. Water transport in maize roots. Measurement of hydraulic conductivity, solute permeability and of .... 1987;
64. Schneider CL, Attinger S, Delfs J-O, Hildebrandt A. Implementing small scale processes at the soil-plant interface – the role of root architectures for calculating root water uptake profiles. *Hydrol Earth Syst Sci Discuss.* 2009;6: 4233–4264.
- 860 65. Carminati A, Vetterlein D. Plasticity of rhizosphere hydraulic properties as a key for efficient utilization of scarce resources. *Ann Bot.* 2013;112: 277–290.
66. Vadez V. Root hydraulics: The forgotten side of roots in drought adaptation. *Field Crops Res.* Elsevier B.V.; 2014; 1–10.
- 865 67. Leitner D, Meunier F, Bodner G, Javaux M, Schnepf A. Impact of contrasted maize root traits at flowering on water stress tolerance – A simulation study. *Field Crops Res.* 2014;165: 125–137.
68. Ndour A, Vadez V, Pradal C, Lucas M. Virtual Plants Need Water Too: Functional-Structural
-

- Root System Models in the Context of Drought Tolerance Breeding. *Front Plant Sci.* 2017;8: 1577.
- 870 69. Zarebanadkouki M, Meunier F, Couvreur V, Cesar J, Javaux M, Carminati A. Estimation of the hydraulic conductivities of lupine roots by inverse modelling of high-resolution measurements of root water uptake. *Ann Bot.* 2016; doi:10.1093/aob/mcw154
70. Doussan C, Pagès L, Vercambre G. Modelling of the hydraulic architecture of root systems: An integrated approach to water absorption - Model description. *Ann Bot. Annals Botany Co;* 1998;81: 213–223.
- 875 71. Meunier F, Draye X, Vanderborght J, Javaux M, Couvreur V. A hybrid analytical-numerical method for solving water flow equations in root hydraulic architectures. *Appl Math Model.* 2017;52: 648–663.
- 880 72. Shrestha P, Sulis M, Masbou M, Kollet S, Simmer C. A Scale-Consistent Terrestrial Systems Modeling Platform Based on COSMO, CLM, and ParFlow. *Mon Weather Rev.* 2014;142: 3466–3483.
73. Holzworth D, Huth NI, Fainges J, Brown H, Zurcher E, Cichota R, et al. APSIM Next Generation: Overcoming challenges in modernising a farming systems model. *Environmental Modelling & Software.* 2018;103: 43–51.
- 885 74. McElrone AJ, Shapland TM, Calderon A, Fitzmaurice L, Paw U KT, Snyder RL. Surface renewal: an advanced micrometeorological method for measuring and processing field-scale energy flux density data. *J Vis Exp.* 2013; e50666.
75. Famiglietti JS, Ryu D, Berg AA, Rodell M, Jackson TJ. Field observations of soil moisture variability across scales. *Water Resour Res.* 2008;44. doi:10.1029/2006wr005804
- 890 76. Wasson AP, Rebetzke GJ, Kirkegaard JA, Christopher J, Richards RA, Watt M. Soil coring at multiple field environments can directly quantify variation in deep root traits to select wheat genotypes for breeding. *J Exp Bot.* 2014;65: 6231–6249.
77. Kuchenbuch RO, Horst GH, Buczko U. Spatial distribution of maize roots by complete 3D soil monolith sampling. *Plant Soil.* Kluwer Academic Publishers; 2009;315: 297–314.
- 895 78. Vepraskas MJ, Hoyt GD. Comparison of the trench-profile and core methods for evaluating root distributions in tillage studies. *Agron J. American Society of Agronomy;* 1988;80: 166–172.
79. Colombi T, Kirchgessner N, Le Marié CA, York LM, Lynch JP, Hund A. Next generation shovelomics: set up a tent and REST. *Plant Soil.* Kluwer Academic Publishers; 2015; Available: <http://link.springer.com/10.1007/s11104-015-2379-7>
- 900 80. Rewald B, Ephrath J. Minirhizotron Techniques. In: Beeckman T, editor. *Plant Roots.* CRC Press; 2013. pp. 42–1–42–16.
81. Garré S, Pagès L, Laloy E, Javaux M, Vanderborght\* J, Vereecken H. Parameterizing a Dynamic Architectural Model of the Root System of Spring Barley from Minirhizotron Data. *Vadose Zone J.* 2012;11: 0.
- 905 82. Vansteenkiste J, Van Loon J, Garré S, Pagès L, Schrevens E, Diels J. Estimating the parameters of a 3-D root distribution function from root observations with the trench profile method: case study with simulated and field-observed root data. *Plant Soil.* 2013;375: 75–88.
83. Meunier F, Rothfuss Y, Bariac T, Biron P, Richard P, Durand J-L, et al. Measuring and Modeling Hydraulic Lift of Using Stable Water Isotopes. *Vadose Zone J.* 2018;17: 0.
- 910 84. Tsuda M, Tyree MT. Plant hydraulic conductance measured by the high pressure flow meter in

- crop plants. *J Exp Bot.* 2000;51: 823–828.
85. Rodrigues ML, Lucília Rodrigues M, Santos TP, Rodrigues AP, de Souza CR, Lopes CM, et al. Hydraulic and chemical signalling in the regulation of stomatal conductance and plant water use in field grapevines growing under deficit irrigation. *Funct Plant Biol.* 2008;35: 565.
- 915 86. Hopmans JW, Nielsen DR, Bristow KL. How useful are small-scale soil hydraulic property measurements for large-scale vadose zone modeling? *Geophysical Monograph Series.* 2002. pp. 247–258.
87. Vrugt JA, Schoups G, Hopmans JW, Young C, Wallender WW, Harter T, et al. Inverse modeling of large-scale spatially distributed vadose zone properties using global optimization. *Water Resour Res.* 2004;40. doi:10.1029/2003wr002706
- 920 88. Verhoef A, Egea G. Modeling plant transpiration under limited soil water: Comparison of different plant and soil hydraulic parameterizations and preliminary implications for their use in land surface models. *Agric For Meteorol.* 2014;191: 22–32.
89. Baram S, Couvreur V, Harter T, Read M, Brown PH, Kandelous M, et al. Estimating Nitrate Leaching to Groundwater from Orchards: Comparing Crop Nitrogen Excess, Deep Vadose Zone Data-Driven Estimates, and HYDRUS Modeling. *Vadose Zone J.* 2016;15: 0.
- 925 90. Couvreur V, Kandelous MM, Sanden BL, Lampinen BD, Hopmans JW. Downscaling transpiration rate from field to tree scale. *Agric For Meteorol.* 2016;221: 71–77.
91. Whitley R, Taylor D, Macinnis-Ng C, Zeppel M, Yunusa I, O’Grady A, et al. Developing an empirical model of canopy water flux describing the common response of transpiration to solar radiation and VPD across five contrasting woodlands and forests. *Hydrol Process.* 2012;27: 1133–1146.
- 930 92. Vrugt JA, van Wijk MT, Hopmans JW, Šimunek J. One-, two-, and three-dimensional root water uptake functions for transient modeling. *Water Resour Res.* 2001;37: 2457–2470.
- 935 93. Šimunek J, Van Genuchten M. Numerical model for simulating multiple solute transport in variably-saturated soils. *Ground Water.* [ars.usda.gov](http://ars.usda.gov); 1995; Available: <https://www.ars.usda.gov/research/publications/publication/?seqNo115=64408>
94. Couvreur V, Vanderborght J, Boff L, Javaux M. Horizontal soil water potential heterogeneity: simplifying approaches for crop water dynamics models. *Hydrol Earth Syst Sci Discuss.* 2014;11: 1203–1252.
- 940 95. Couvreur V, Vanderborght J, Draye X, Javaux M. Dynamic aspects of soil water availability for isohydric plants: Focus on root hydraulic resistances. *Water Resour Res.* 2014;50: 8891–8906.
- 945 96. Cai G, Vanderborght J, Klotzsche A, van der Kruk J, Neumann J, Hermes N, et al. Construction of Minirhizotron Facilities for Investigating Root Zone Processes. *Vadose Zone J.* Madison, WI: The Soil Science Society of America, Inc.; 2016;15: 1–13.
97. van Genuchten M, Leij FJ, Yates. MS. The RETC Code for Quantifying the Hydraulic Functions of Unsaturated Soils. EPA Report 600/2-91/065, U.S. Salinity Laboratory, USDA, ARS, Riverside, California.; 1991.
- 950 98. Zeng G, Birchfield ST, Wells CE. Automatic discrimination of fine roots in minirhizotron images. *New Phytol.* Blackwell Science Ltd; 2008;117: 549–557.
99. Feddes RA, Kowalik PJ, Zaradny H. *Simulation of Field Water Use and Crop Yield.* Wiley; 1978.
100. Šimunek J, Hopmans JW. Modeling compensated root water and nutrient uptake. *Ecol*

- 
- 955 Modell. Elsevier B.V.; 2009;220: 505–521.
101. Cai G, Vanderborght J, Langensiepen M, Schnepf A, Hüging H, Vereecken H. Root growth, water uptake, and sap flow of winter wheat in response to different soil water conditions. *Hydrol Earth Syst Sci. Copernicus GmbH*; 2018;22: 2449.
- 960 102. Lobet G, Draye X, Périlleux C. An online database for plant image analysis software tools. *Plant Methods*. 2013;9: 38.
103. Lobet G. Image Analysis in Plant Sciences: Publish Then Perish. *Trends Plant Sci*. 2017;22: 559–566.
104. Dupuy L, Gregory PJ, Bengough AG. Root growth models: towards a new generation of continuous approaches. *J Exp Bot. Soc Experiment Biol*; 2010;61: 2131–2143.
- 965 105. Band LR, Wells DM, Fozard JA, Ghetiu T, French AP, Pound MP, et al. Systems Analysis of Auxin Transport in the Arabidopsis Root Apex. *Plant Cell. American Society of Plant Biologists*; 2014; Available: <http://www.plantcell.org/cgi/doi/10.1105/tpc.113.119495>
106. Stoma S, Lucas M, Chopard J, Schaedel M, Traas J, Godin C. Flux-based transport enhancement as a plausible unifying mechanism for auxin transport in meristem development. *PLoS Comput Biol*. 2008;4: e1000207.
- 970 107. Robbins NE 2nd, Dinneny JR. Growth is required for perception of water availability to pattern root branches in plants. *Proc Natl Acad Sci U S A*. 2018; doi:10.1073/pnas.1710709115
108. Choat B, Jansen S, Brodribb TJ, Cochard H, Delzon S, Bhaskar R, et al. Global convergence in the vulnerability of forests to drought. *Nature*. 2012;491: 752–755.
- 975 109. Choat B, Cobb AR, Jansen S. Structure and function of bordered pits: new discoveries and impacts on whole-plant hydraulic function. *New Phytol*. 2008;177: 608–625.
110. Sanderson J, Whitbread FC, Clarkson DT. Persistent xylem cross-walls reduce the axial hydraulic conductivity in the apical 20 cm of barley seminal root axes: implications for the driving force for water movement. *Plant Cell Environ. Blackwell Publishing Ltd*; 1988;11: 247–256.
- 980 111. Shane MW, McCully ME, Canny MJ. Architecture of Branch-root Junctions in Maize: Structure of the Connecting Xylem and the Porosity of Pit Membranes. *Ann Bot. Oxford University Press*; 2000;85: 613–624.
- 985 112. Tixier A, Herbette S, Jansen S, Capron M, Tordjeman P, Cochard H, et al. Modelling the mechanical behaviour of pit membranes in bordered pits with respect to cavitation resistance in angiosperms. *Ann Bot*. 2014;114: 325–334.
113. Brodersen CR, McElrone AJ, Choat B, Lee EF, Shackel KA, Matthews MA. In vivo visualizations of drought-induced embolism spread in *Vitis vinifera*. *Plant Physiol*. 2013;161: 1820–1829.
- 990 114. Giordano R, Salleo A, Salleo S, Wanderlingh F. Flow in xylem vessels and Poiseuille's law. *Can J Bot*. 1978;56: 333–338.
115. Lewis AM, Boose ER. Estimating Volume Flow Rates Through Xylem Conduits. *Am J Bot*. 1995;82: 1112.
- 995 116. David TS, David JS, Pinto CA, Cermak J, Nadezhdin V, Nadezhdina N. Hydraulic connectivity from roots to branches depicted through sap flow: analysis on a *Quercus suber* tree. *Funct Plant Biol. CSIRO PUBLISHING*; 2012;39: 103–115.
117. Keyes SD, Daly KR, Gostling NJ, Jones DL, Talboys P, Pinzer BR, et al. High resolution synchrotron imaging of wheat root hairs growing in soil and image based modelling of
-

- phosphate uptake. *New Phytol.* Blackwell Science Ltd; 2013; Available: <http://doi.wiley.com/10.1111/nph.12294>
- 1000
118. Carminati A, Passioura JB, Zarebanadkouki M, Ahmed MA, Ryan PR, Watt M, et al. Root hairs enable high transpiration rates in drying soils. *New Phytol.* 2017; doi:10.1111/nph.14715
119. Javaux M, Schroeder T, Vanderborght J, Vereecken H. Use of a three-dimensional detailed modeling approach for predicting root water uptake. *Vadose Zone J.* 2008;7: 1079–1088.
- 1005
120. Lobet G, Pagès L, Draye X. A modeling approach to determine the importance of dynamic regulation of plant hydraulic conductivities on the water uptake dynamics in the soil-plant-atmosphere system. *Ecol Modell.* Elsevier B.V.; 2014;290: 65–75.
121. Postma JA, Kuppe C, Owen MR, Mellor N, Griffiths M, Bennett MJ, et al. OpenSimRoot: widening the scope and application of root architectural models. *New Phytol.* 2017; doi:10.1111/nph.14641
- 1010
122. Doussan C, Pierret A, Garrigues E, Pagès L. Water Uptake by Plant Roots: II – Modelling of Water Transfer in the Soil Root-system with Explicit Account of Flow within the Root System – Comparison with Experiments. *Plant Soil.* Kluwer Academic Publishers; 2006;283: 99–117.
- 1015
123. Schnepf A, Leitner D, Landl M, Lobet G, Mai TH, Morandage S, et al. CRootBox: A Structural-Functional Modelling Framework For Root Systems [Internet]. *bioRxiv.* 2017. p. 139980. doi:10.1101/139980
124. Pagès L, Vercambre G, Drouet J-L, Lecompte F, Collet C, LeBot J. RootTyp: a generic model to depict and analyse the root system architecture. *Plant Soil.* Kluwer Academic Publishers; 2004;258: 103–119.
- 1020
125. Barczy J-F, Rey H, Griffon S, Jourdan C. DigR: a generic model and its open source simulation software to mimic three-dimensional root-system architecture diversity. *Ann Bot.* 2018; doi:10.1093/aob/mcy018
- 1025
126. Dupuy L, Fourcaud T, Stokes A, Danjon F. A density-based approach for the modelling of root architecture: application to Maritime pine (*Pinus pinaster* Ait.) root systems. *J Theor Biol.* Elsevier; 2005;236: 323–334.
127. Huber K, Vanderborght J, Javaux M, Schröder N, Dodd IC, Vereecken H. Modelling the impact of heterogeneous rootzone water distribution on the regulation of transpiration by hormone transport and/or hydraulic pressures. *Plant Soil.* Kluwer Academic Publishers; 2014; Available: <http://link.springer.com/10.1007/s11104-014-2188-4>
- 1030
128. Huber K, Vanderborght J, Javaux M, Vereecken H. Simulating transpiration and leaf water relations in response to heterogeneous soil moisture and different stomatal control mechanisms. *Plant Soil.* 2015;394: 109–126.
- 1035
129. Hack-ten Broeke MJD, Kroes JG, Bartholomeus RP, van Dam JC, de Wit AJW, Supit I, et al. Quantification of the impact of hydrology on agricultural production as a result of too dry, too wet or too saline conditions [Internet]. 2016. doi:10.5194/soil-2016-24
130. Gijsman AJ, Jagtap SS, Jones JW. Wading through a swamp of complete confusion: how to choose a method for estimating soil water retention parameters for crop models. *Eur J Agron.* 2002;18: 77–106.
- 1040
131. Landl M, Huber K, Schnepf A, Vanderborght J, Javaux M, Glyn Bengough A, et al. A new model for root growth in soil with macropores. *Plant Soil.* Springer International Publishing; 2016; 1–18.
132. Schroeder N, Javaux M, Vanderborght J, Steffen B, Vereecken H. Effect of Root Water and Solute Uptake on Apparent Soil Dispersivity: A Simulation Study. *Vadose Zone Journal.* 2012;

Available: <http://vzj.geoscienceworld.org/content/11/3/vzj2012.0009.abstract>

- 1045
133. Roose T, Keyes SD, Daly KR, Carminati A, Otten W, Vetterlein D, et al. Challenges in imaging and predictive modeling of rhizosphere processes. *Plant Soil*. Kluwer Academic Publishers; 2016; 1–30.
134. Schwartz N, Carminati A, Javaux M. The impact of mucilage on root water uptake—A numerical study. *Water Resour Res*. 2016;52: 264–277.
- 1050
135. Vereecken H, Schnepf A, Hopmans JW, Javaux M, Or D, Roose T, et al. Modeling Soil Processes: Review, Key Challenges, and New Perspectives. *Vadose Zone J*. 2016;15: 0.
1. Zeng, G., Birchfield, S. T., & Wells, C. E. (2008). Automatic discrimination of fine roots in minirhizotron images. *The New Phytologist*, 117(2), 549–557. Retrieved from <http://doi.wiley.com/10.1111/j.1469-8137.2007.02271.x>
